# Supplementary material for: Beshanzuamide A, an unprecedented prenylated indole alkaloid produced by Aspergillus sp. Y-2 from the critically endangered conifer Abies beshanzuensis
Source: Royal Society of Chemistry journal article supplement (doi:10.1039/d2ra01578a), 2022-01-01

## SUPPLWMENTARY INFORMATION

### **Beshanzuamide A, an unprecedented prenylated indole alkaloid produced by *Aspergillus* sp. Y-2 from the critically endangered conifer *Abies beshanzuensis***

Yuan-Xing Zhu<sup>1a</sup>, Wenxin Ding<sup>1a</sup>, Jin-Feng Hu<sup>b</sup>, Juan Xiong<sup>\*b</sup>, Jiyang Li<sup>\*a</sup>

<sup>a</sup> Department of Biological Medicines, School of Pharmacy, Fudan University, Shanghai 201203, China

<sup>b</sup> Department of Natural Medicines, School of Pharmacy, Fudan University, Shanghai 201203, China

<sup>1</sup>These authors contributed equally to this work.

#### **Corresponding Authors**

\*E-mail: lijyang@fudan.edu.cn (J. Li)

\*E-mail: jxiong@fudan.edu.cn (J. Xiong)

### **Contents**

|                                                                              |   |
|------------------------------------------------------------------------------|---|
| Part 1. The structures of notoamide O and compound <b>1</b> .....            | 2 |
| Part 2. GIAO <sup>13</sup> NMR data computational details for <b>1</b> ..... | 2 |
| Part 2. ECD computational details for <b>1</b> .....                         | 6 |
| Part 3. Original HR-ESIMS and 1D/2D NMR spectra of <b>1</b> .....            | 7 |

The structures of notoamide O and compound 1

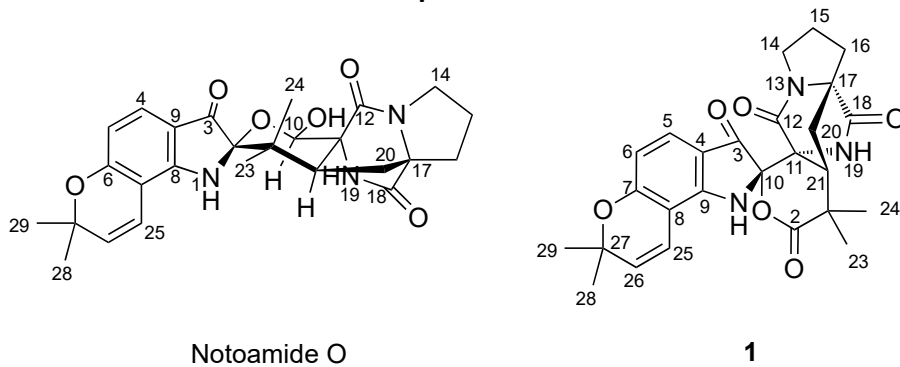

Fig. S1. Four possible relative configurations of compound 1 for quantum calculations

GIAO <sup>13</sup>NMR data computational details for 1.

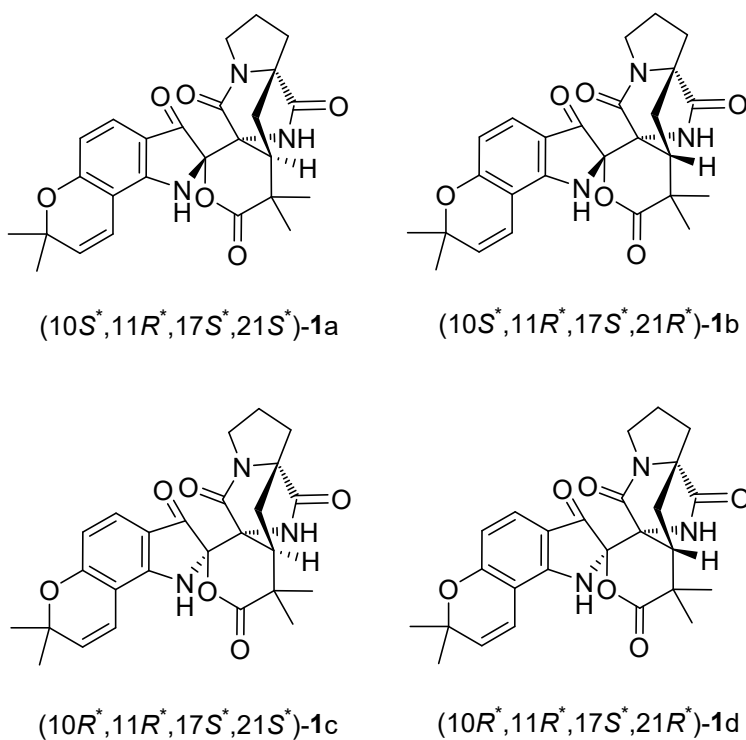

Fig. S2. Four possible relative configurations of compound 1 for quantum calculations

**Table S1.**  $^{13}\text{C}$  NMR calculation of **1a-1d**, fitting to the experimental data of compound **1**.

| no. | Exptl. | Calcd. of <b>1a</b> | Abs dev | Calcd. of <b>1b</b> | Abs dev | Calcd. of <b>1c</b> | Abs dev | Calcd. of <b>1d</b> | Abs dev |
|-----|--------|---------------------|---------|---------------------|---------|---------------------|---------|---------------------|---------|
| 2   | 178.4  | 177.81              | 0.59    | 178.34              | 0.06    | 177.52              | 0.88    | 178.61              | 0.21    |
| 3   | 193.3  | 193.75              | 0.45    | 194.04              | 0.74    | 191.64              | 1.66    | 194.21              | 0.91    |
| 4   | 127.9  | 130.34              | 2.44    | 129.63              | 1.73    | 130.58              | 2.68    | 129.36              | 1.46    |
| 5   | 111.9  | 112.26              | 0.36    | 112.74              | 0.84    | 113.29              | 1.39    | 112.53              | 0.63    |
| 6   | 164    | 164.59              | 0.59    | 163.49              | 0.51    | 164.46              | 0.46    | 162.43              | 1.57    |
| 7   | 106.2  | 105.07              | 1.13    | 106.90              | 0.70    | 106.88              | 0.68    | 106.92              | 0.72    |
| 8   | 158.8  | 157.89              | 0.91    | 159.40              | 0.60    | 157.56              | 1.24    | 157.06              | 1.74    |
| 9   | 112.3  | 110.29              | 2.01    | 113.32              | 1.02    | 113.13              | 0.83    | 113.87              | 1.57    |
| 10  | 90.5   | 92.56               | 2.06    | 89.71               | 0.79    | 91.19               | 0.69    | 92.55               | 2.05    |
| 11  | 61.7   | 61.72               | 0.02    | 62.85               | 1.15    | 62.41               | 0.71    | 66.17               | 4.47    |
| 12  | 168.2  | 169.17              | 0.97    | 166.68              | 1.52    | 166.14              | 2.06    | 167.47              | 0.73    |
| 14  | 45.3   | 45.29               | 0.01    | 44.20               | 1.10    | 43.81               | 1.49    | 44.25               | 1.05    |
| 15  | 25.4   | 26.16               | 0.76    | 25.28               | 0.12    | 24.02               | 1.38    | 25.53               | 0.13    |
| 16  | 30     | 30.72               | 0.72    | 29.75               | 0.25    | 28.79               | 1.21    | 30.00               | 0.00    |
| 17  | 68.2   | 68.35               | 0.15    | 67.53               | 0.67    | 67.68               | 0.52    | 68.00               | 0.20    |
| 18  | 175    | 171.92              | 3.08    | 172.30              | 2.70    | 174.52              | 0.48    | 171.84              | 3.16    |
| 20  | 31.6   | 32.70               | 1.10    | 32.52               | 0.92    | 32.99               | 1.39    | 32.87               | 1.27    |
| 21  | 42.3   | 41.38               | 0.92    | 42.50               | 0.20    | 44.25               | 1.95    | 40.59               | 1.71    |
| 22  | 43.4   | 43.41               | 0.01    | 43.69               | 0.29    | 42.68               | 0.72    | 42.52               | 0.88    |
| 23  | 26.5   | 25.39               | 1.11    | 24.85               | 1.65    | 28.64               | 2.14    | 23.30               | 3.20    |
| 24  | 22.5   | 21.84               | 0.66    | 25.63               | 3.13    | 23.47               | 0.97    | 24.83               | 2.33    |
| 25  | 116.3  | 119.14              | 2.84    | 118.73              | 2.43    | 118.98              | 2.68    | 118.98              | 2.68    |
| 26  | 129.9  | 128.77              | 1.13    | 129.00              | 0.90    | 130.12              | 0.22    | 129.20              | 0.70    |
| 27  | 79.4   | 80.26               | 0.86    | 79.36               | 0.04    | 79.55               | 0.15    | 79.05               | 0.35    |
| 28  | 28.5   | 27.55               | 0.95    | 27.04               | 1.46    | 26.05               | 2.45    | 27.11               | 1.39    |
| 29  | 28.6   | 27.78               | 0.82    | 26.62               | 1.98    | 25.75               | 2.85    | 26.84               | 1.76    |
|     |        | MAE                 | 1.02    | MAE                 | 1.06    | MAE                 | 1.30    | MAE                 | 1.42    |
|     |        | RMS                 | 1.31    | RMS                 | 1.33    | RMS                 | 1.52    | RMS                 | 1.77    |
|     |        | P <sub>mean</sub>   | 40.82%  | P <sub>mean</sub>   | 34.04%  | P <sub>mean</sub>   | 25.16%  | P <sub>mean</sub>   | 18.50%  |
|     |        | Prel                | 99.12%  | Prel                | 0.88%   | Prel                | 0.00%   | Prel                | 0.00%   |

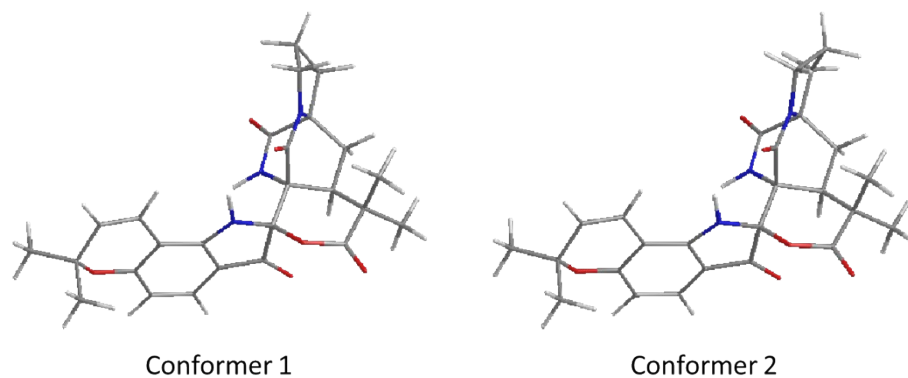

**Fig. S3.** Conformers of **1a** optimized on B3LYP-D3(BJ)/TZVP (IEFPCM, CH<sub>3</sub>OH) level of theory for NMR calculation.

**Table S2.** Gibbs free energy and Boltzmann distribution of conformers of **1a** calculated on B3LYP-D3(BJ)/TZVP level with IEFPCM solvation model (CH<sub>3</sub>OH).

| Conformers | Gibbs free energy (a.u.) | $\Delta G$ (kcal/mol) | Population |
|------------|--------------------------|-----------------------|------------|
| 1          | -1622.945662             | 0                     | 58.31%     |
| 2          | -1622.945273             | 0.244101157           | 39.83%     |

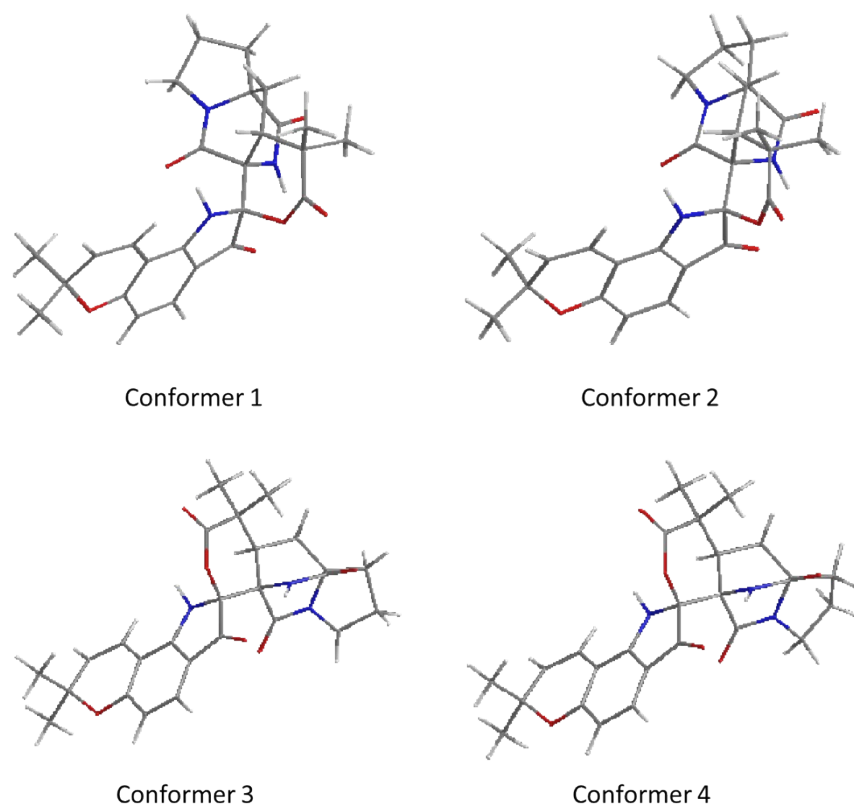

**Fig. S4.** Conformers of structure **1b** optimized on B3LYP-D3(BJ)/TZVP (IEFPCM, CH<sub>3</sub>OH) level of theory for NMR calculation.

**Table S3.** Gibbs free energy and Boltzmann distribution of conformers of **1b** calculated on B3LYP-D3(BJ)/TZVP level with IEFPCM solvation model (CH<sub>3</sub>OH)

| Conformers | Gibbs free energy (a.u.) | $\Delta G$ (kcal/mol) | Population |
|------------|--------------------------|-----------------------|------------|
| 1          | -1622.940707             | 0                     | 48.16%     |
| 2          | -1622.940253             | 0.284889268           | 29.76%     |
| 3          | -1622.939741             | 0.60617408            | 17.29%     |
| 4          | -1622.938532             | 1.364832945           | 4.80%      |

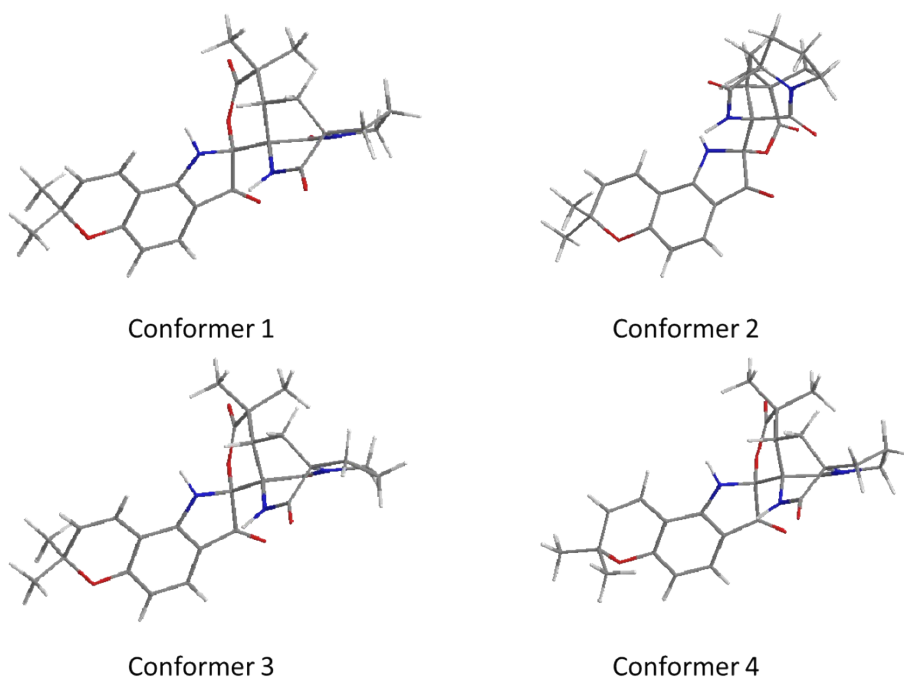

**Fig. S5.** Conformers of **1c** optimized on B3LYP-D3(BJ)/TZVP (IEFPCM, CH<sub>3</sub>OH) level of theory for NMR calculation

**Table S4.** Gibbs free energy and Boltzmann distribution of conformers of **1c** calculated on B3LYP-D3(BJ)/TZVP level with IEFPCM solvation model (CH<sub>3</sub>OH)

| Conformers | Gibbs free energy (a.u.) | $\Delta G$ (kcal/mol) | Population |
|------------|--------------------------|-----------------------|------------|
| 1          | -1622.932835             | 0                     | 40.61%     |
| 2          | -1622.932265             | 0.357680358           | 22.19%     |
| 3          | -1622.932213             | 0.390310847           | 21.00%     |
| 4          | -1622.931968             | 0.54405065            | 16.20%     |



Fig. S7. The HR-ESIMS of compound 1

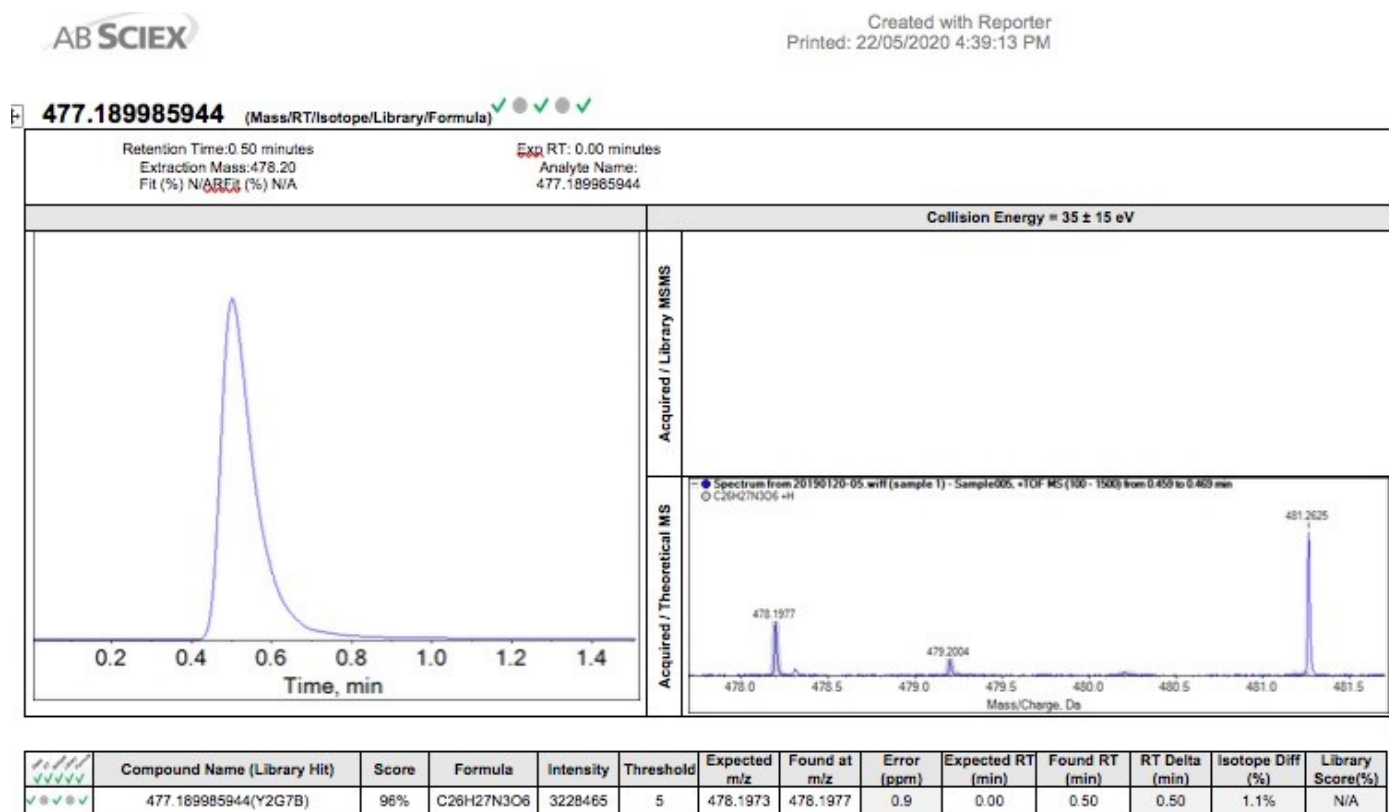

**Fig. S8.** The  $^1\text{H}$ -NMR spectrum of compound **1** (600 MHz) in  $\text{CD}_3\text{OD}$

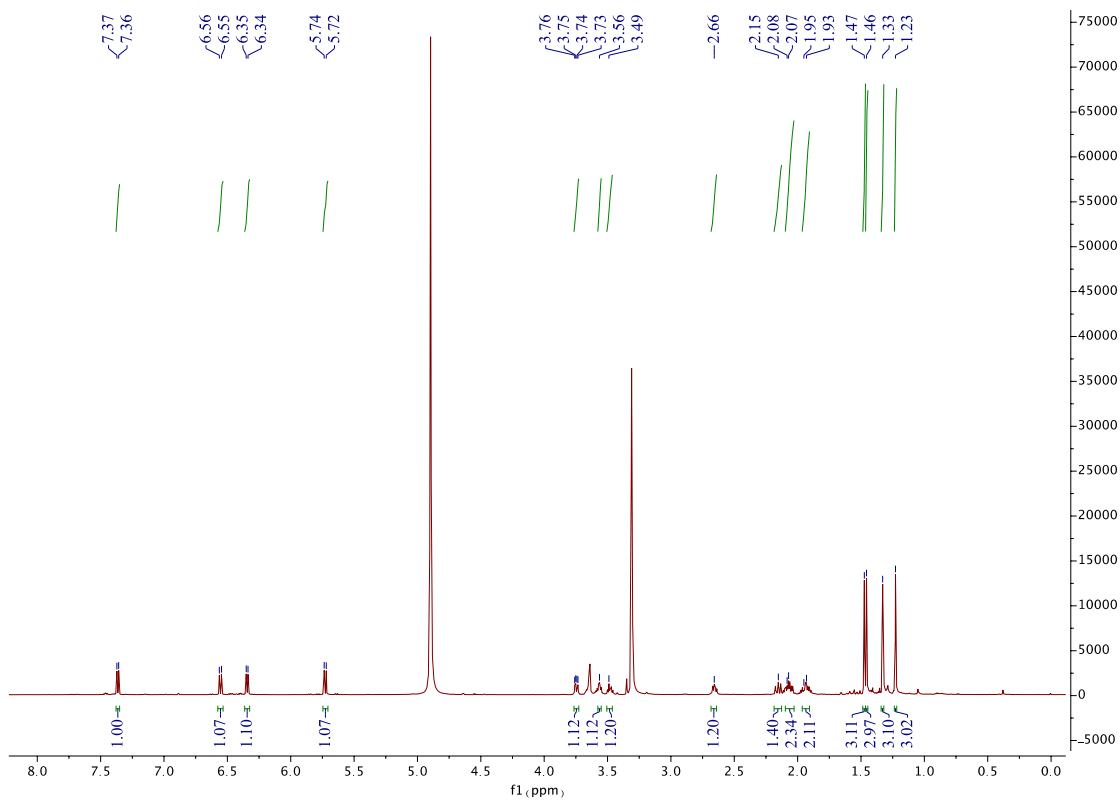

**Fig. S9.** The  $^{13}\text{C}$ -NMR spectrum of compound **1** (150 MHz) in  $\text{CD}_3\text{OD}$

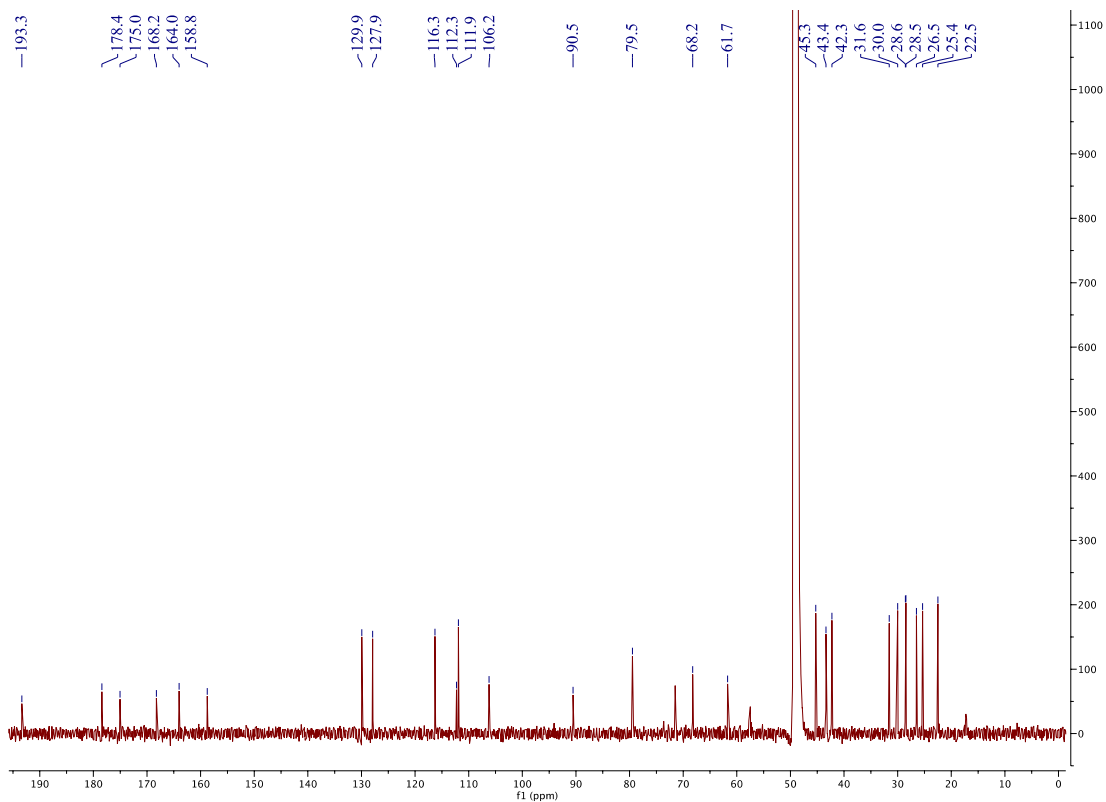



**Fig. S10.** The DEPT 135 spectrum of compound **1** (150 MHz) in CD<sub>3</sub>OD

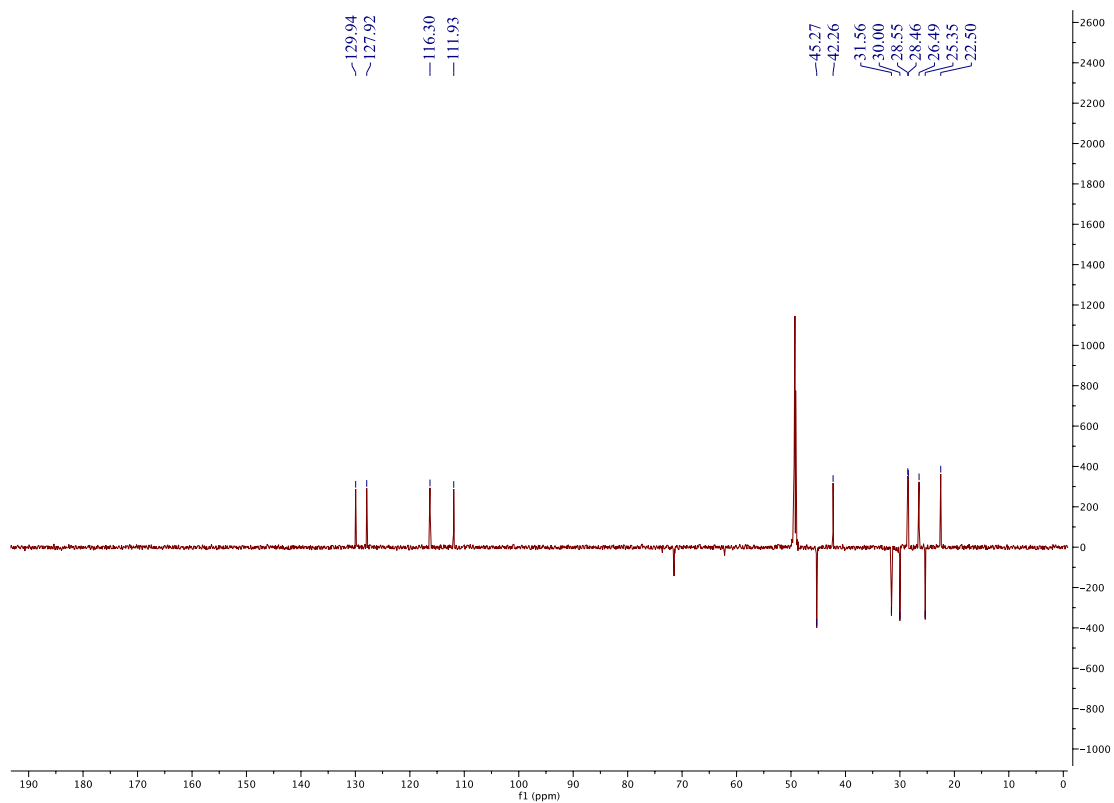

**Fig. S11.** The HSQC spectrum of compound **1** (600 MHz) in CD<sub>3</sub>OD

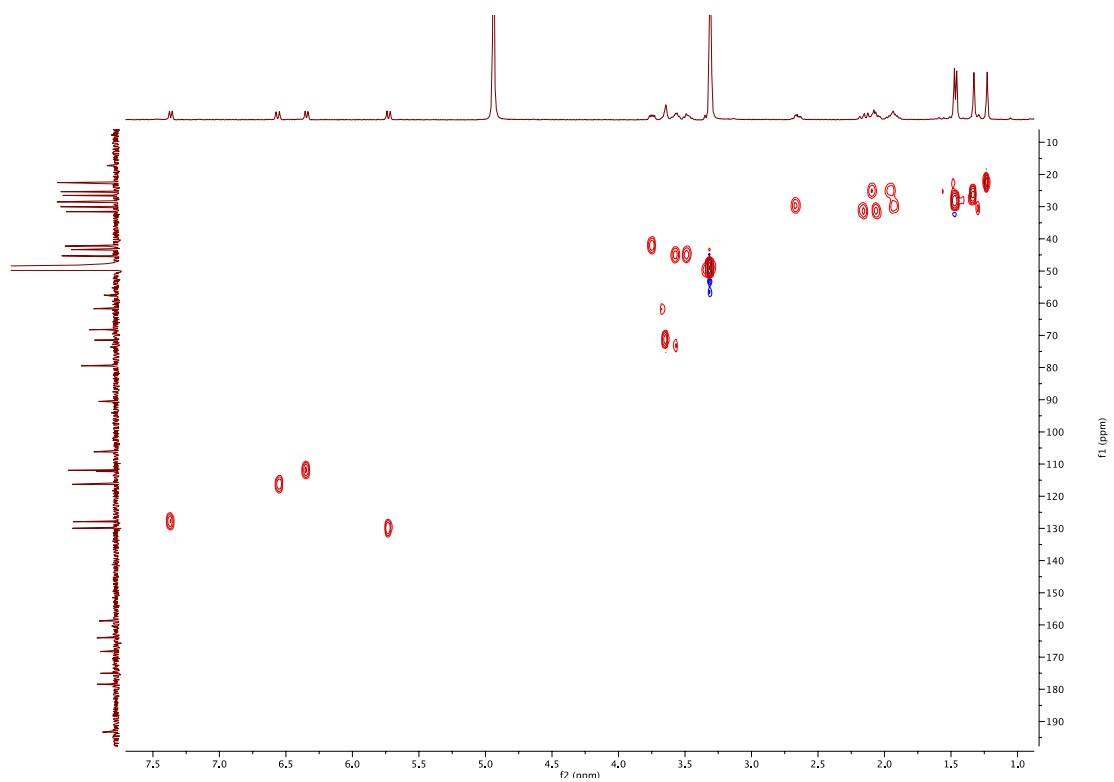

**Fig. S12.** The HMBC spectrum of compound **1** (600 MHz) in CD<sub>3</sub>OD

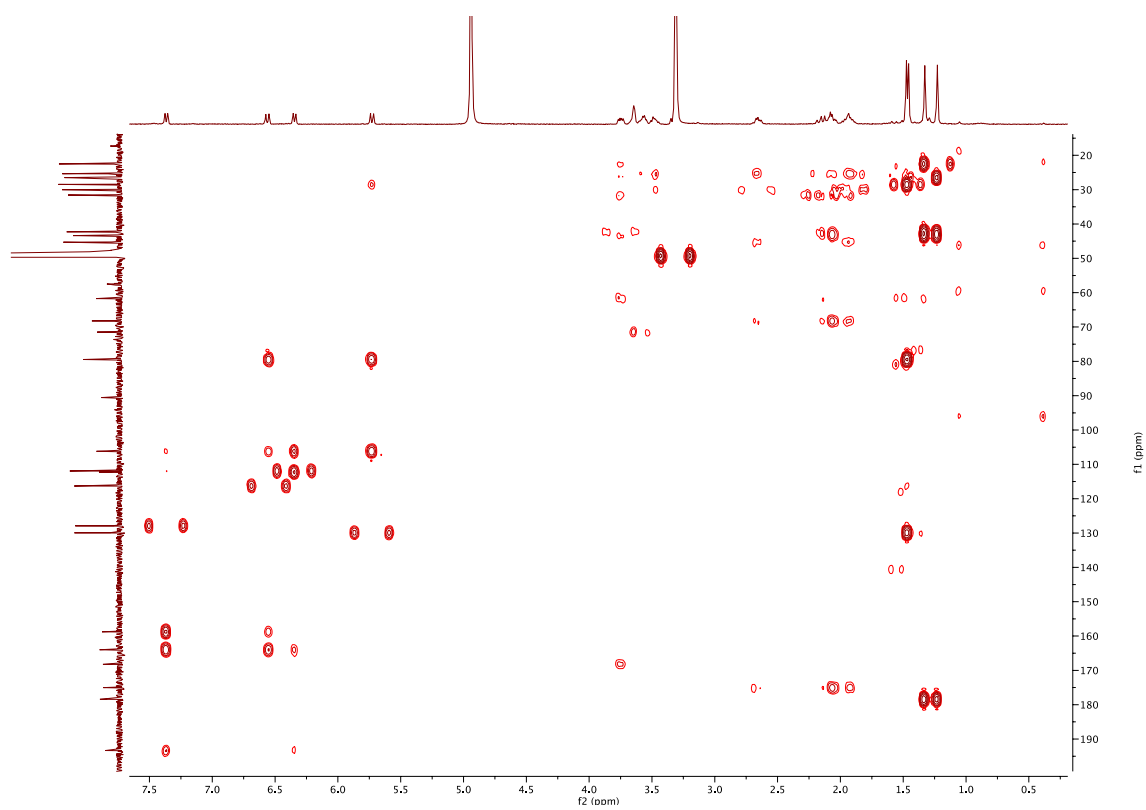

**Fig. S13.** The <sup>1</sup>H-<sup>1</sup>H COSY spectrum of compound **1** (600 MHz) in CD<sub>3</sub>OD

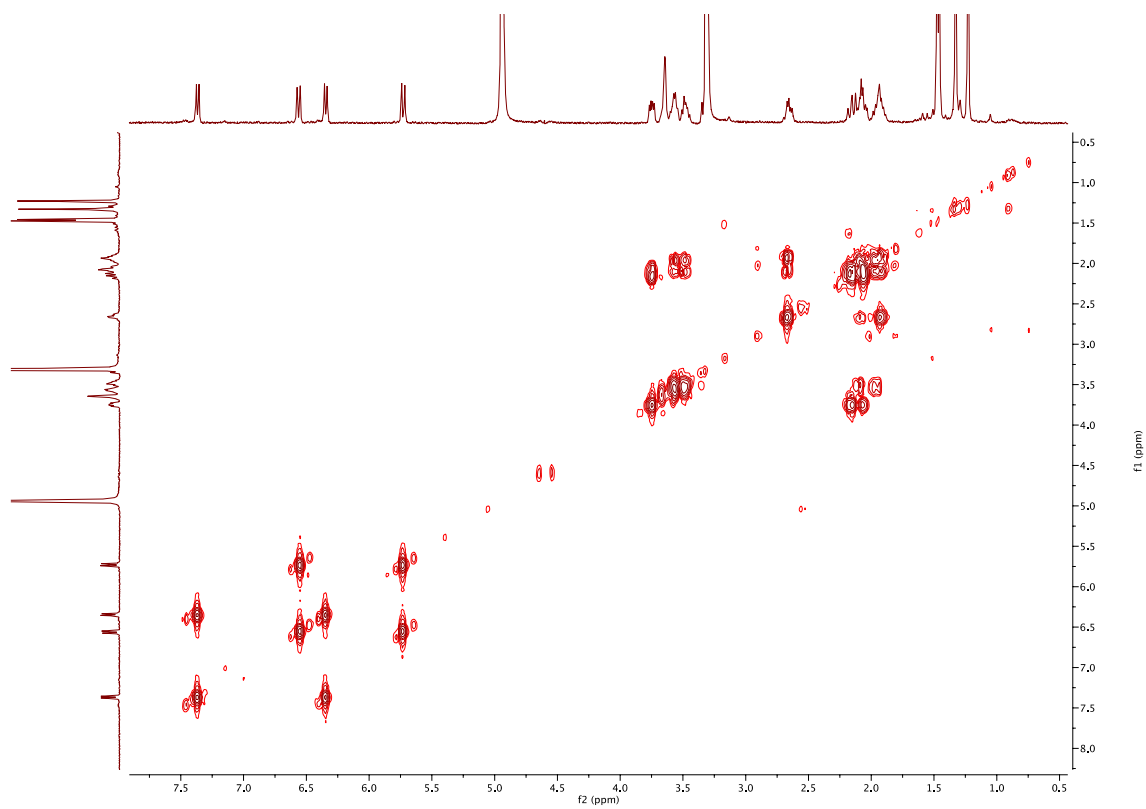

Fig. S14. The ROESY spectrum of compound **1** in CD<sub>3</sub>OD

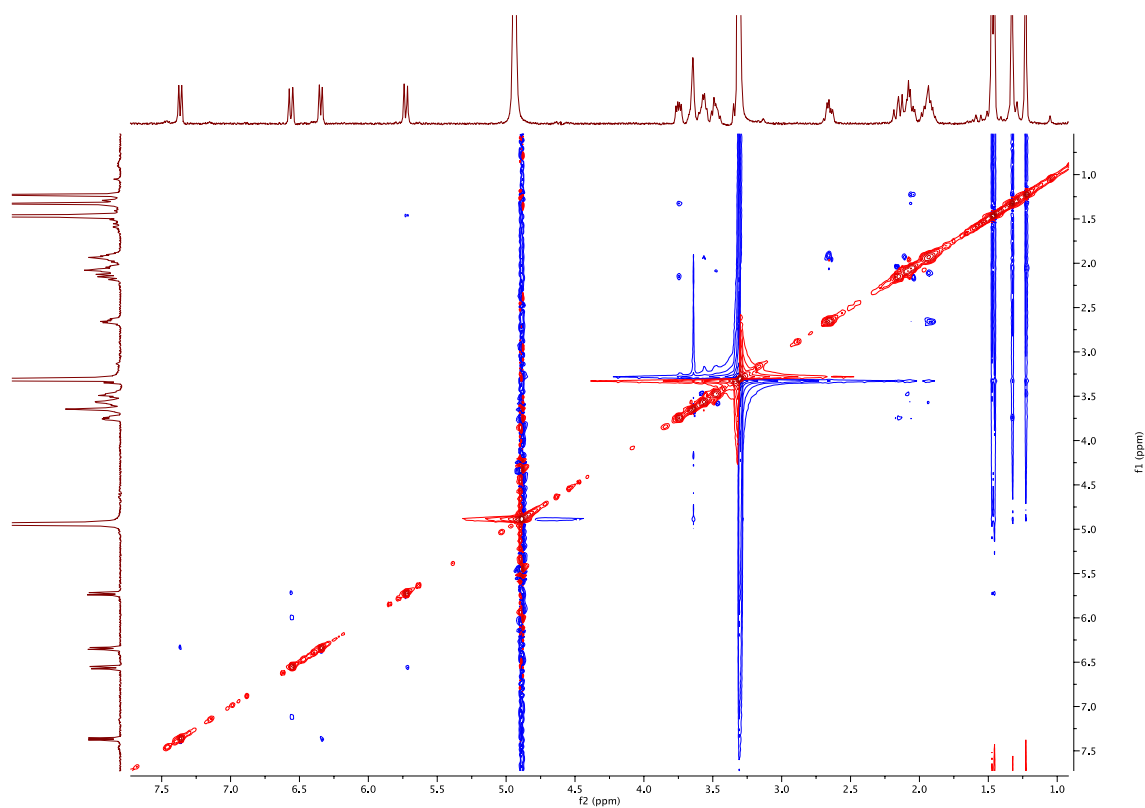

Fig. S15. The <sup>1</sup>H-NMR spectrum of compound **1** (400 MHz) in DMSO-*d*<sub>6</sub>

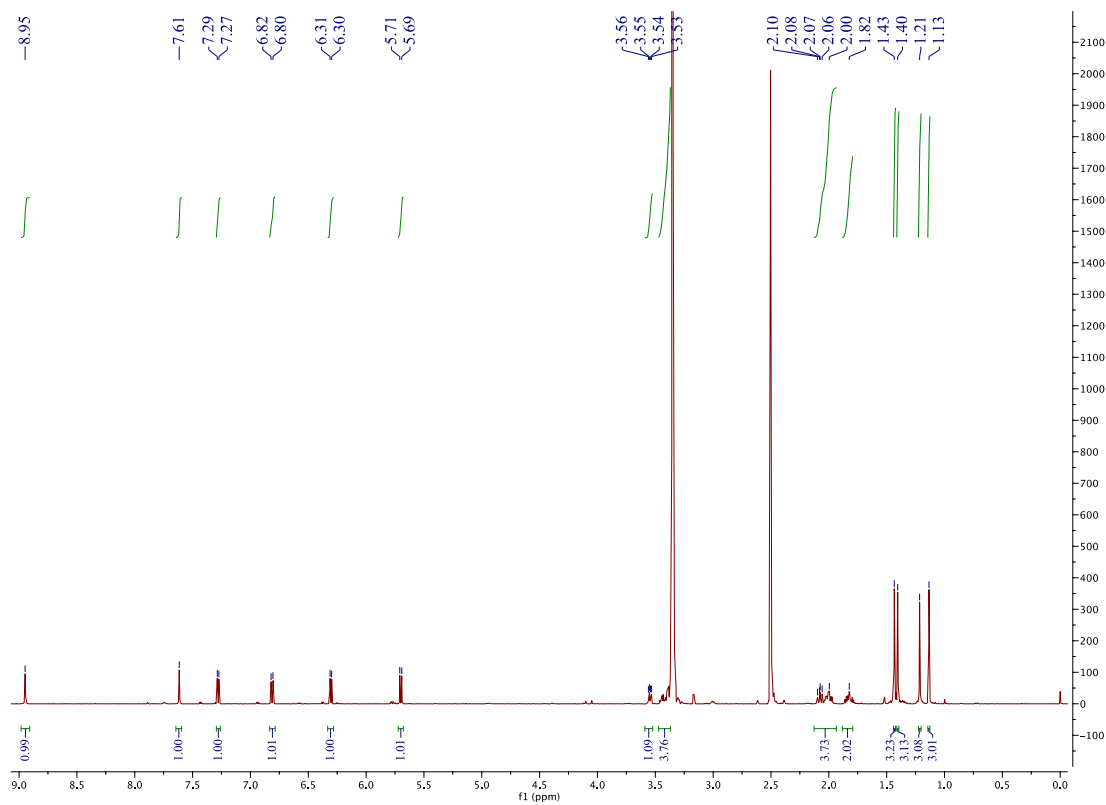

Fig. S16. The  $^{13}\text{C}$ -NMR spectrum of compound **1** (150 MHz) in  $\text{DMSO-}d_6$

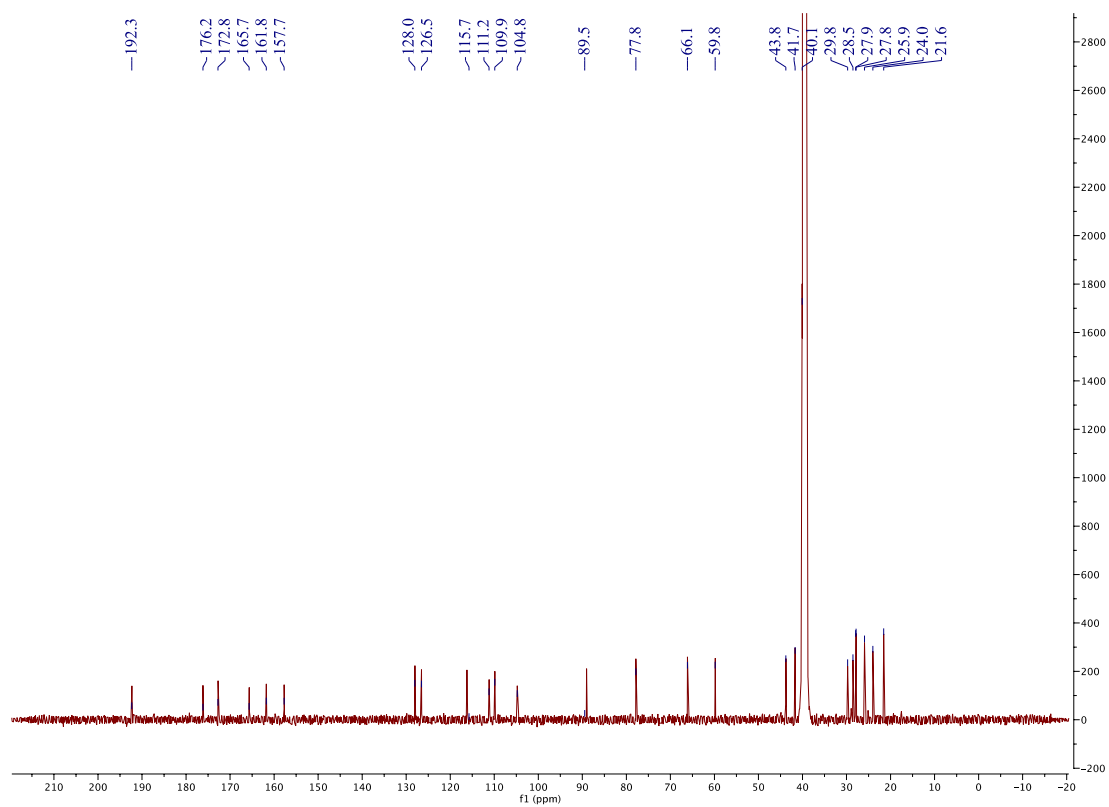

Fig. S17. The HMBC spectrum of compound **1** (600 MHz) in  $\text{DMSO-}d_6$

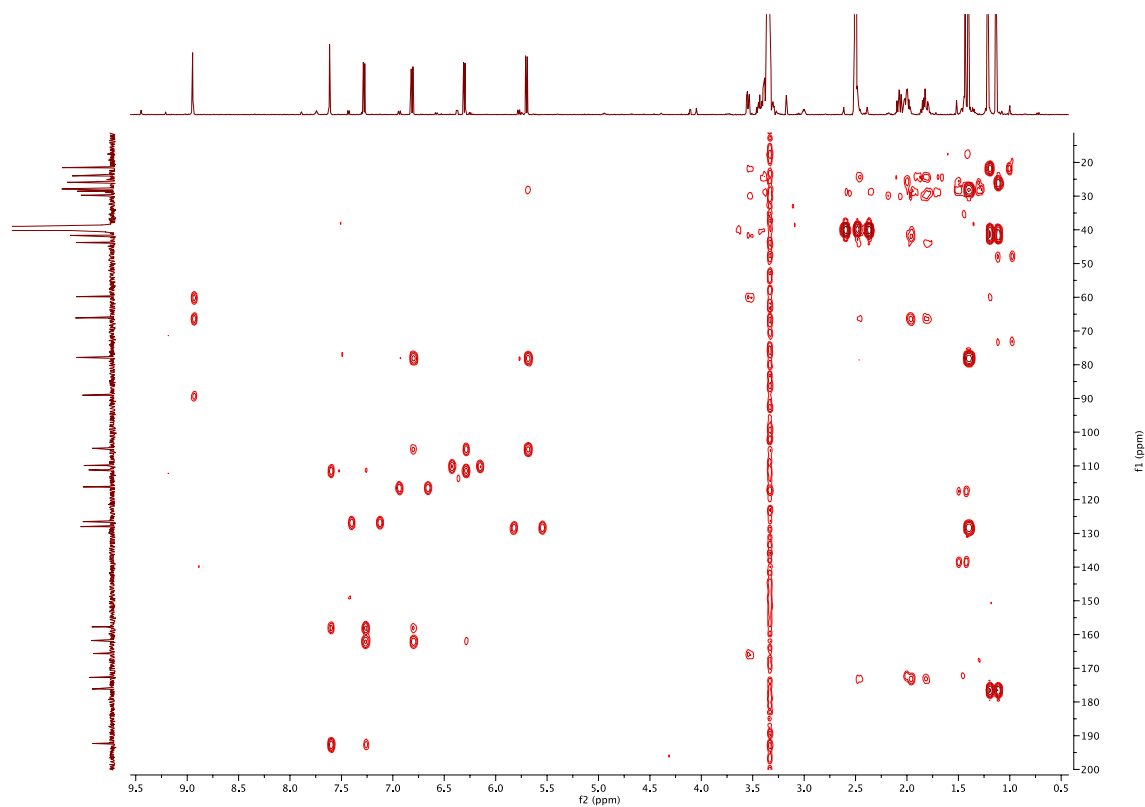

**Fig. S18.** The ROESY spectrum of compound **1** in DMSO- $d_6$

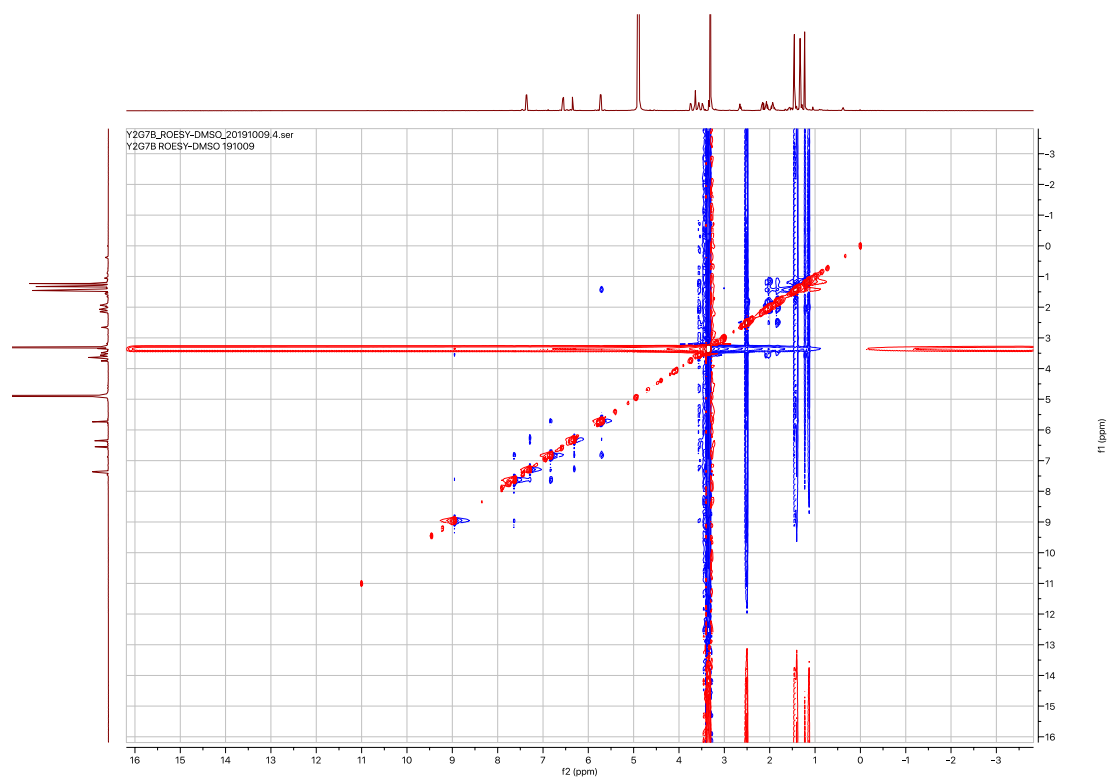

Supplement: d2ra01578a1.pdf [file d2ra01578a1.pdf]
